# Supplementary material for: Tailoring a local acid-like microenvironment for efficient neutral hydrogen evolution
Source: Springer Nature journal article supplement (doi:10.1038/s41467-023-39963-8), 2023-07-14
Supplement: MOESM1 [file 41467_2023_39963_MOESM1_ESM.pdf]

## **Supplementary Information**

### **Tailoring a local acid-like microenvironment for efficient neutral hydrogen evolution**

Xiaozhong Zheng<sup>1</sup>, Xiaoyun Shi<sup>1</sup>, Honghui Ning<sup>1</sup>, Rui Yang<sup>1</sup>, Bing Lu<sup>1</sup>, Qian Luo<sup>1</sup>,  
Shanjun Mao<sup>1</sup>, Lingling Xi<sup>1</sup>, Yong Wang<sup>1,2\*</sup>

*<sup>1</sup>Advanced Materials and Catalysis Group, Center of Chemistry for Frontier Technologies,  
State Key Laboratory of Clean Energy Utilization, Institute of Catalysis, Department of  
Chemistry, Zhejiang University, Hangzhou 310028, P. R. China.*

*<sup>2</sup>College of Chemistry and Molecular Engineering, Zhengzhou University, Zhengzhou 450001,  
China*

*\*Corresponding author E-mail: chemwy@zju.edu.cn*

**This file includes:**

**Supplementary Figures 1 to 33**

**Supplementary Tables 1 to 3**

**Supplementary References**

## **Table of Contents**

|                                          |            |
|------------------------------------------|------------|
| <b>1. Supplementary Figures.....</b>     | <b>S3</b>  |
| <b>2. Supplementary Tables.....</b>      | <b>S36</b> |
| <b>3. Supplementary References .....</b> | <b>S40</b> |

## 1. Supplementary Figures

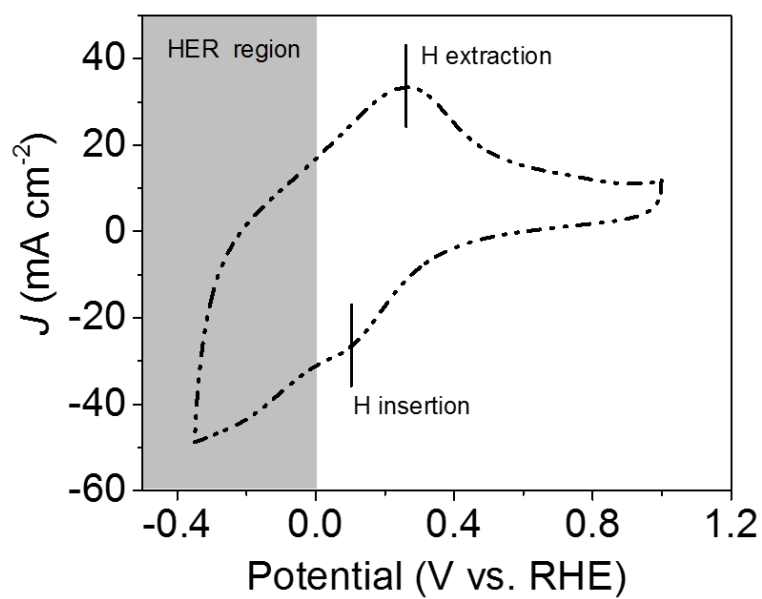

**Supplementary Figure 1. Redox properties of  $\text{WO}_3$ .** CV curve of the  $\text{WO}_3$  from  $-0.35 \sim 1.0 \text{ V}_{\text{RHE}}$  at  $50 \text{ mV s}^{-1}$ . In HER potential region,  $\text{WO}_3$  experienced hydrogen insertion process.

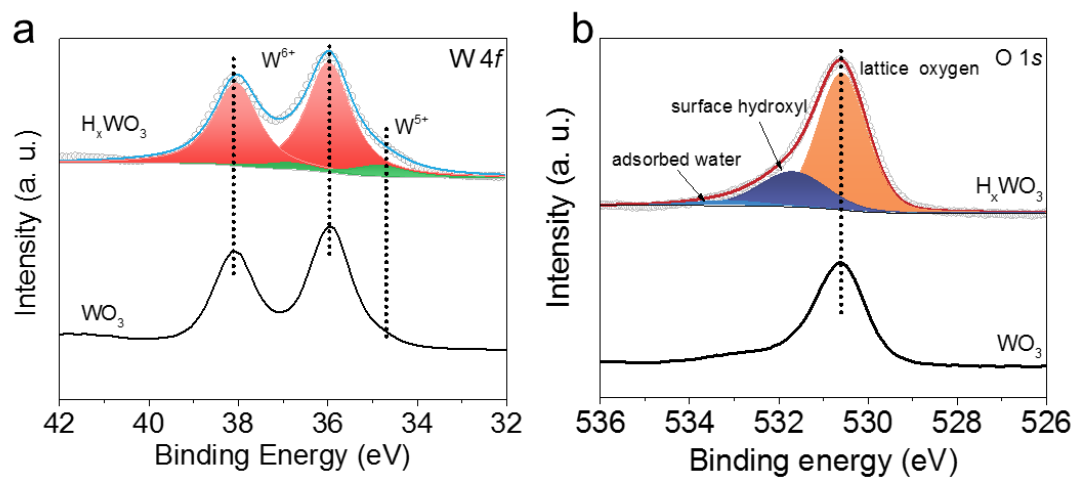

**Supplementary Figure 2. XPS spectra of  $\text{WO}_3$  and  $\text{H}_x\text{WO}_3$ .** (a) High-resolution spectra for the W 4f of  $\text{WO}_3$  and  $\text{H}_x\text{WO}_3$ . (b) High-resolution spectra for the O 1s of  $\text{WO}_3$  and  $\text{H}_x\text{WO}_3$ . These results confirm the formation of  $\text{W}^{5+}\text{-OH}$  after hydrogen insertion in  $\text{H}_x\text{WO}_3$ .

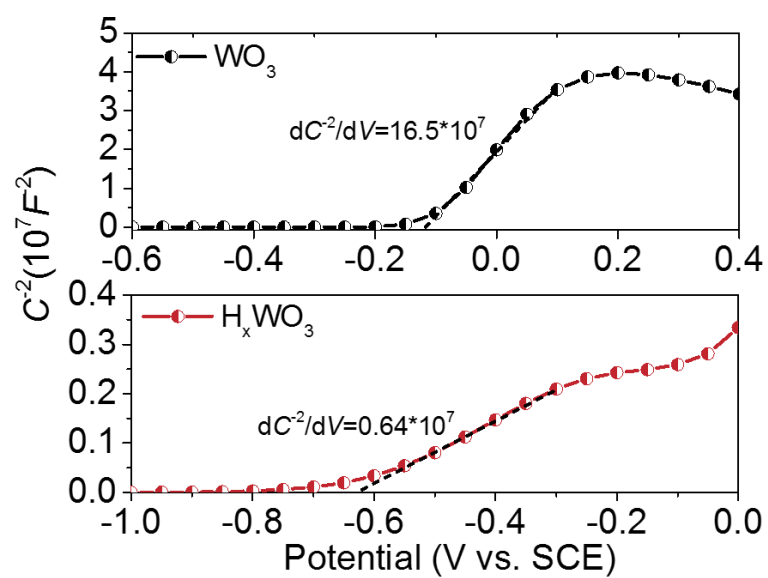

**Supplementary Figure 3. Analysis of electrode surface properties.** Mott-Schottky (M-S) plots of WO<sub>3</sub> and H<sub>x</sub>WO<sub>3</sub>.

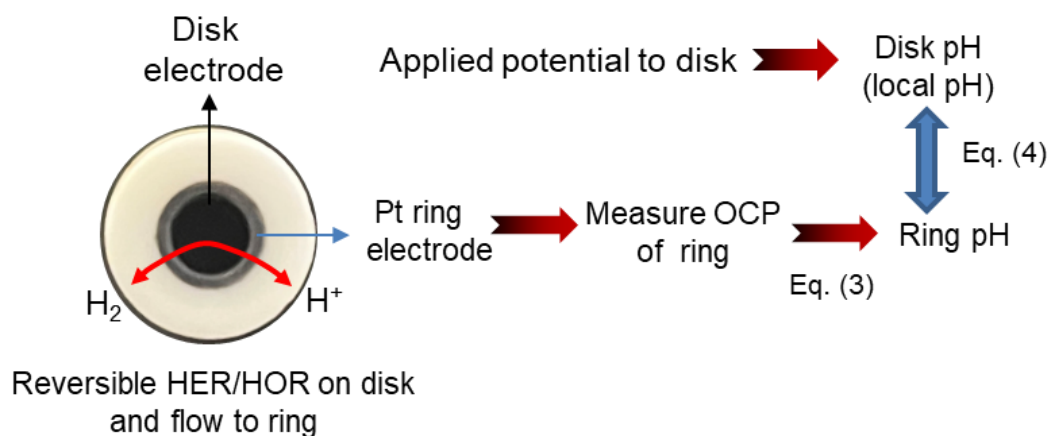

**Supplementary Figure 4. Principles for detecting local pH.** Schematic diagram for monitoring pH on the electrode surface using an RRDE technology, the equations (3) and (4) are given in Method section.

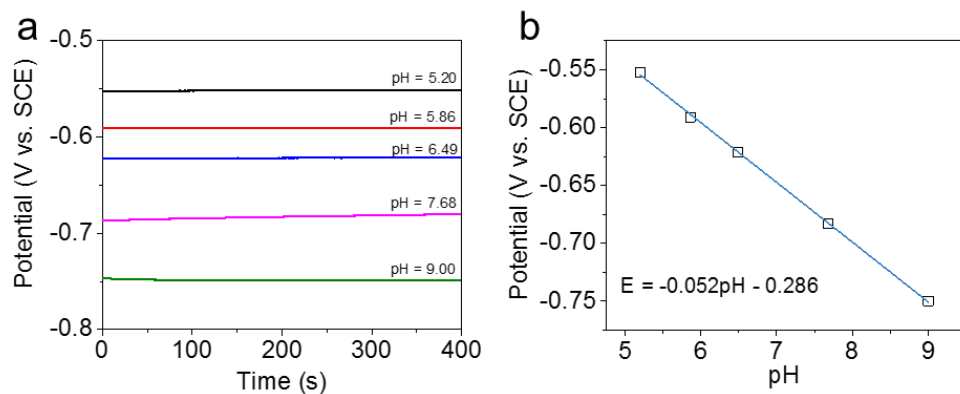

**Supplementary Figure 5. The relationship between  $E_{ocp}$  of Pt ring electrode and pH.** (a) Time and (b) pH dependence of open circuit potential ( $E_{ocp}$ ) for Pt ring electrode. The measurement was performed in 1.0 M PBS solutions, and the pH of the PBS solutions was changed by adding  $\text{H}_2\text{SO}_4$  or KOH.

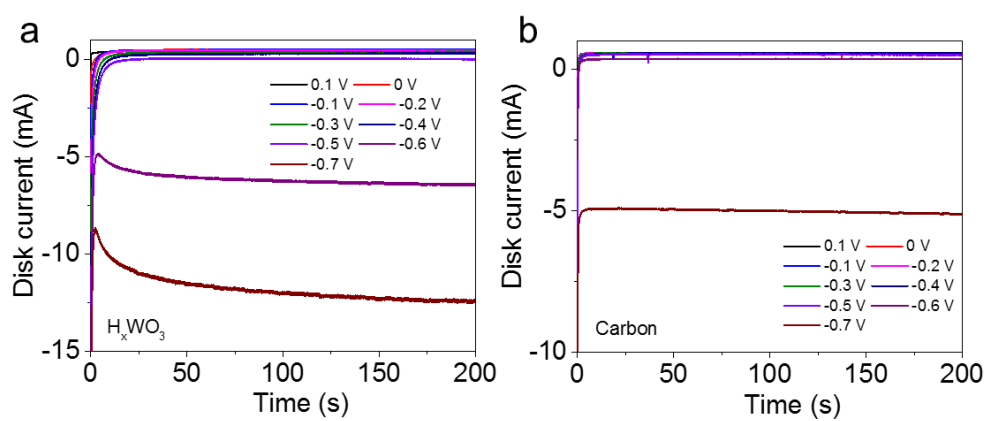

**Supplementary Figure 6. The steady-state current of electrodes at different potentials. J-T curves of  $H_xWO_3$  (a) and carbon (b) support in different potentials.**



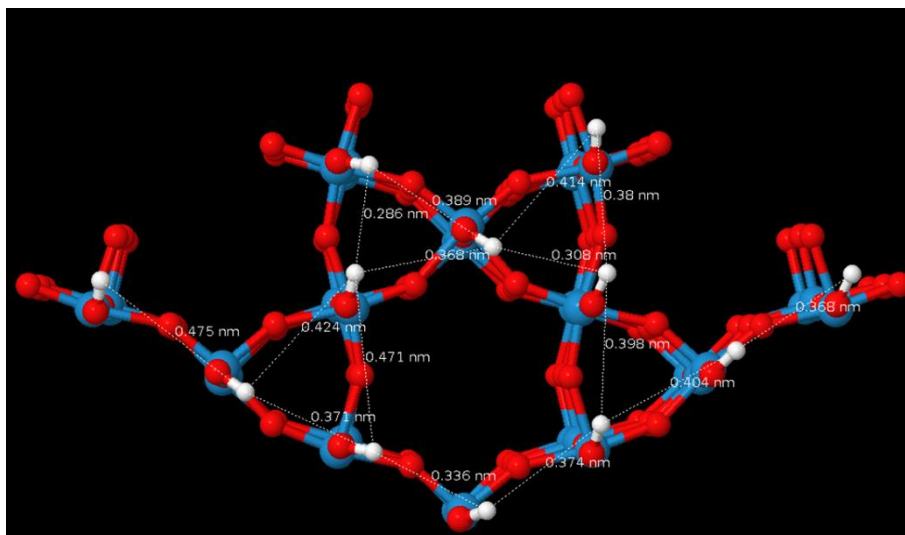

**Supplementary Figure 7. Structural analysis of  $H_xWO_3$  model.** The distance of hydride species on  $H_xWO_3$ .

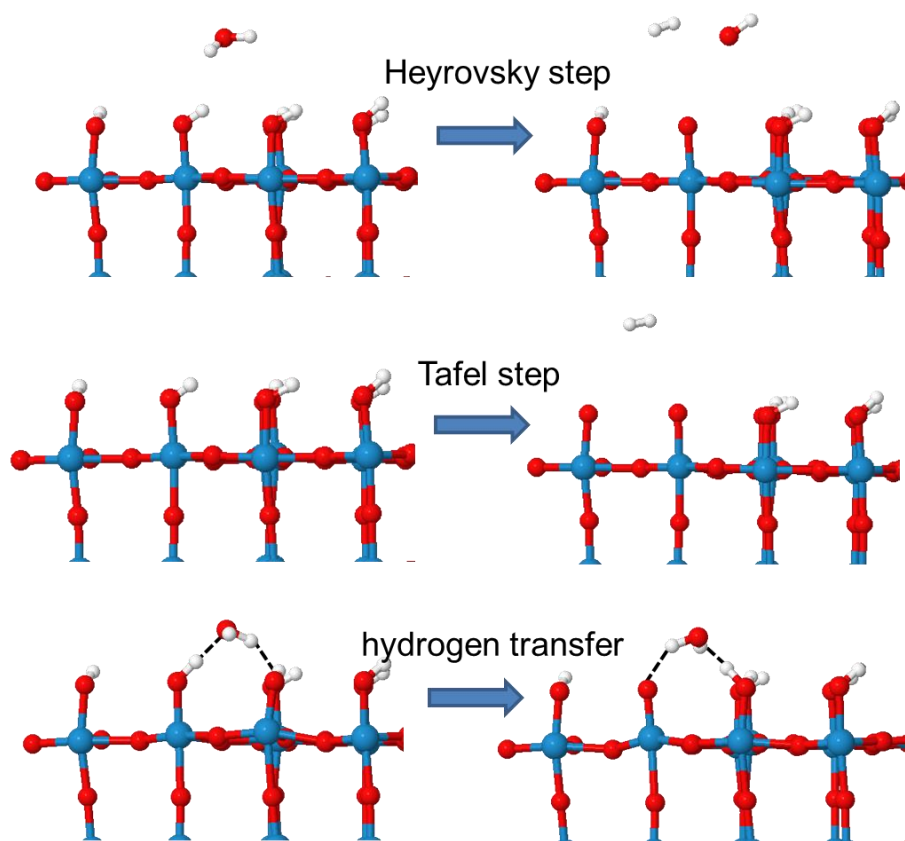

**Supplementary Figure 8. Exploration of HER mechanism on  $H_xWO_3$  model.** HER Configurations of  $H_xWO_3$  involved in H-H coupling (Heyrovsky and Tafel steps) and H-H transfer process.

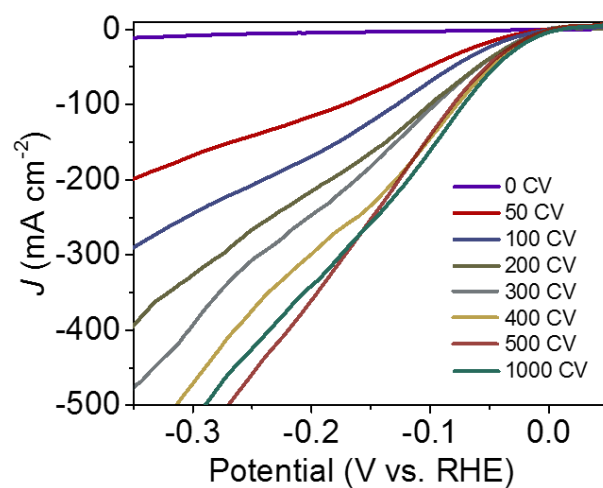

**Supplementary Figure 9. Activation process of Ir- $\text{H}_x\text{WO}_3$ .** HER polarization curves of the Ir- $\text{H}_x\text{WO}_3$  with 95% iR compensation after different numbers of potential cycles were performed on it.

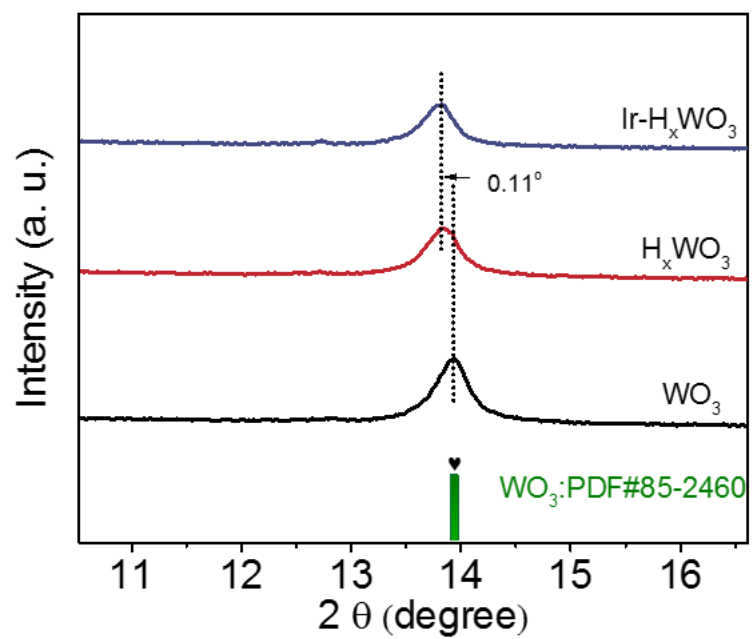

**Supplementary Figure 10. Analysis of XRD data.** The XRD patterns of  $WO_3$ ,  $H_xWO_3$  and Ir- $H_xWO_3$  catalysts in the small range.

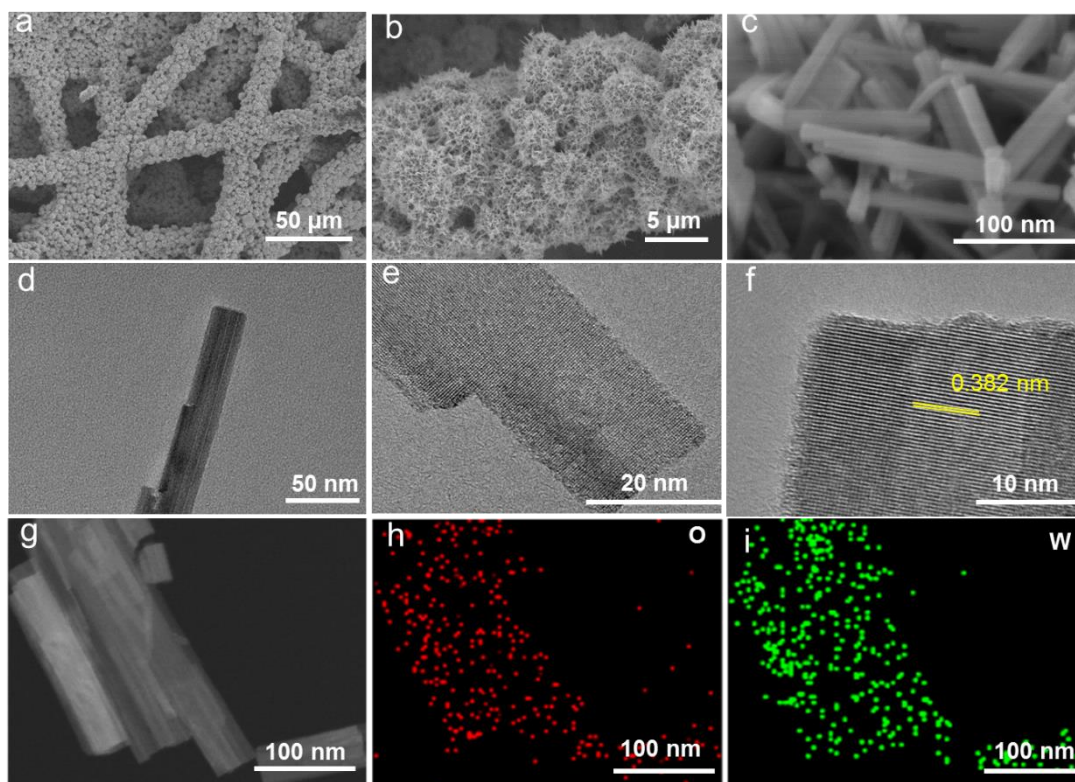

**Supplementary Figure 11. Morphological characterization of  $\text{WO}_3$ .** (a-c) SEM images of  $\text{WO}_3$  nanorods grown on CFP at different resolutions. (d-f) TEM and HRTEM images of  $\text{WO}_3$  nanorods. (g-i) HAADF-STEM image and corresponding EDS maps of  $\text{WO}_3$  for O and W.

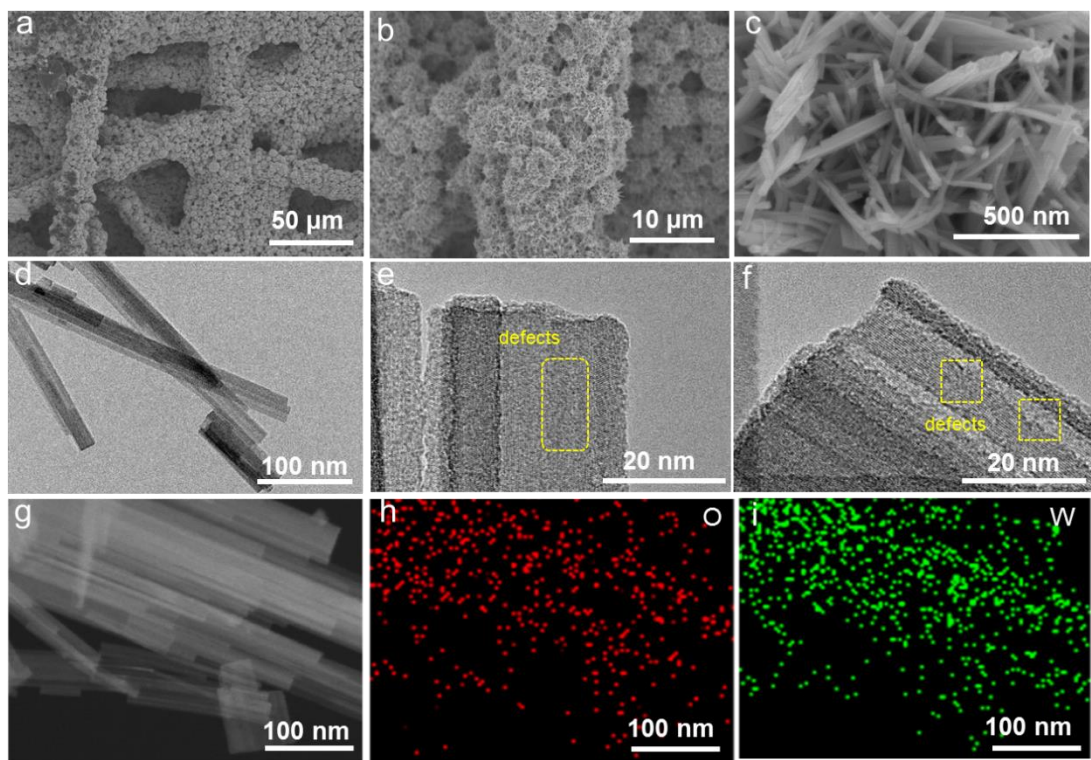

**Supplementary Figure 12. Morphological characterization of  $H_xWO_3$ .** (a-c) SEM images of  $H_xWO_3$  nanorods grown on CFP at different resolutions. (d-f) TEM and HRTEM images of  $H_xWO_3$  nanorods. (g-i) HAADF-STEM image and corresponding EDS maps of  $H_xWO_3$  for O and W.



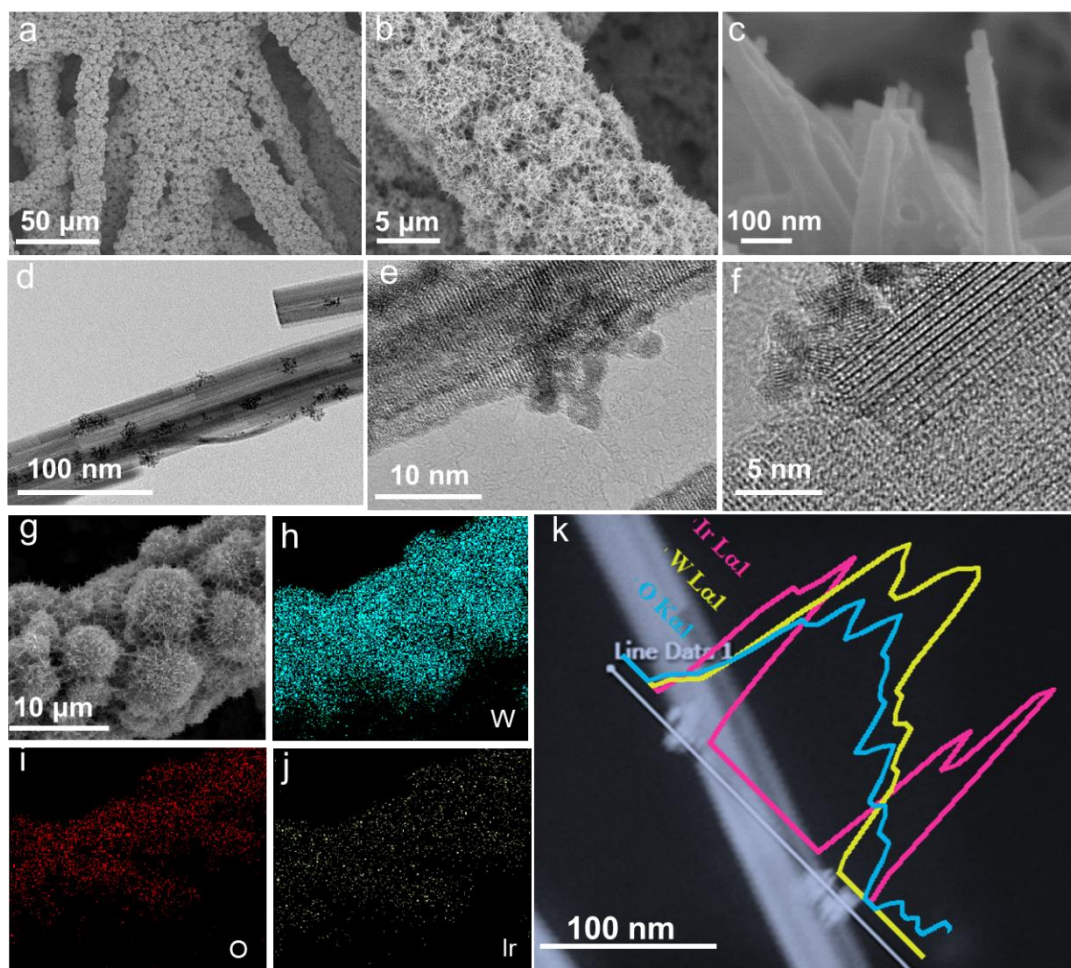

**Supplementary Figure 13. Morphological characterization of Ir-H<sub>x</sub>WO<sub>3</sub>.** (a-c) SEM images of Ir-H<sub>x</sub>WO<sub>3</sub> nanorods grown on CFP at different resolutions. (d-f) TEM and HRTEM images of H<sub>x</sub>WO<sub>3</sub> nanorods; (g-j) The EDS maps of of Ir-H<sub>x</sub>WO<sub>3</sub> for Ir, W and O elements. (k) The line-scan profile of Ir-H<sub>x</sub>WO<sub>3</sub> for Ir, W and O elements.

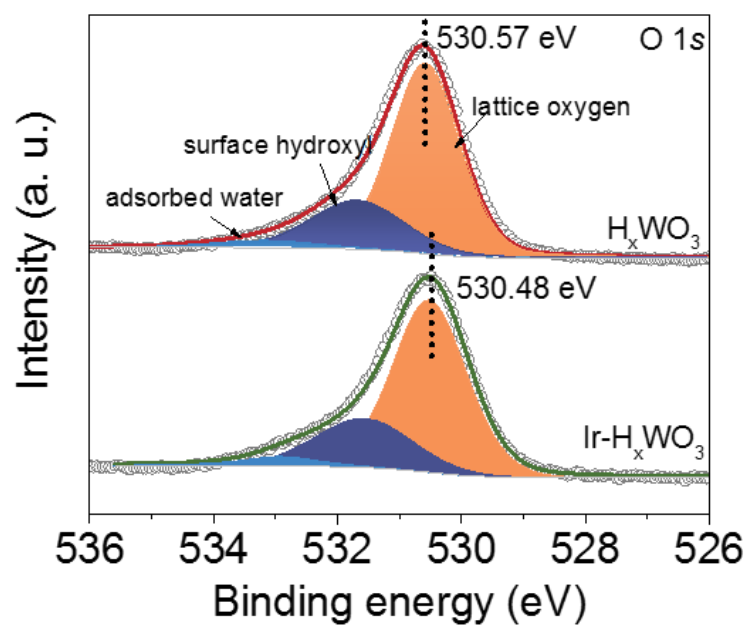

**Supplementary Figure 14. Analysis of O 1s data.** High-resolution O 1s spectra of  $\text{Ir-H}_x\text{WO}_3$  and  $\text{H}_x\text{WO}_3$ .



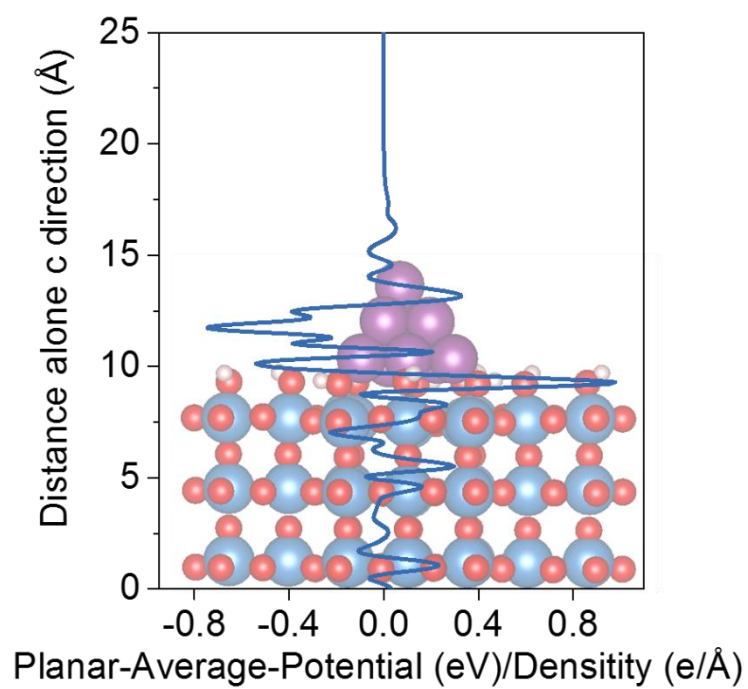

**Supplementary Figure 15. Analysis of interfacial built-in electric fields.** Planar average potential of Ir<sub>10</sub>-H<sub>x</sub>WO<sub>3</sub> along the Z-direction.

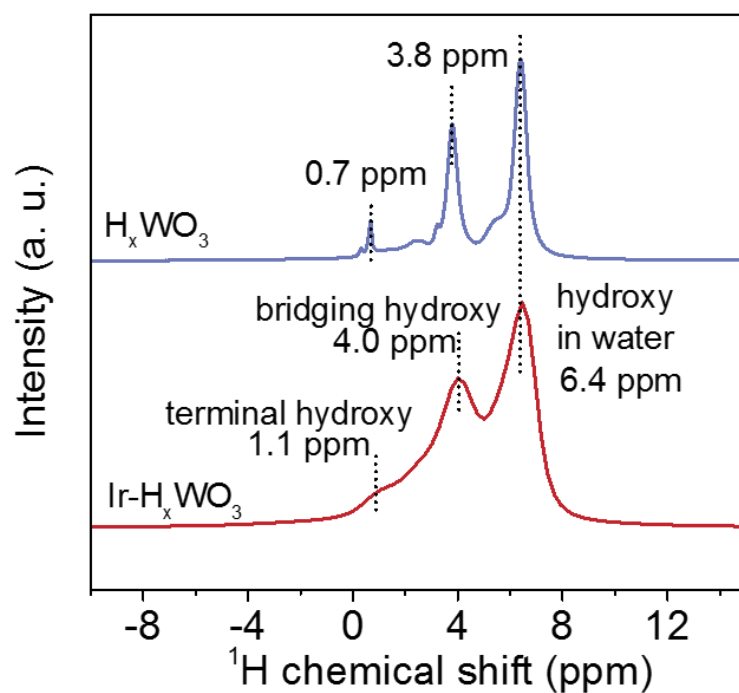

**Supplementary Figure 16.** Analysis of chemical environment of hydrogen species.  $^1\text{H}$  NMR spectra of  $\text{Ir-H}_x\text{WO}_3$  and  $\text{H}_x\text{WO}_3$ .

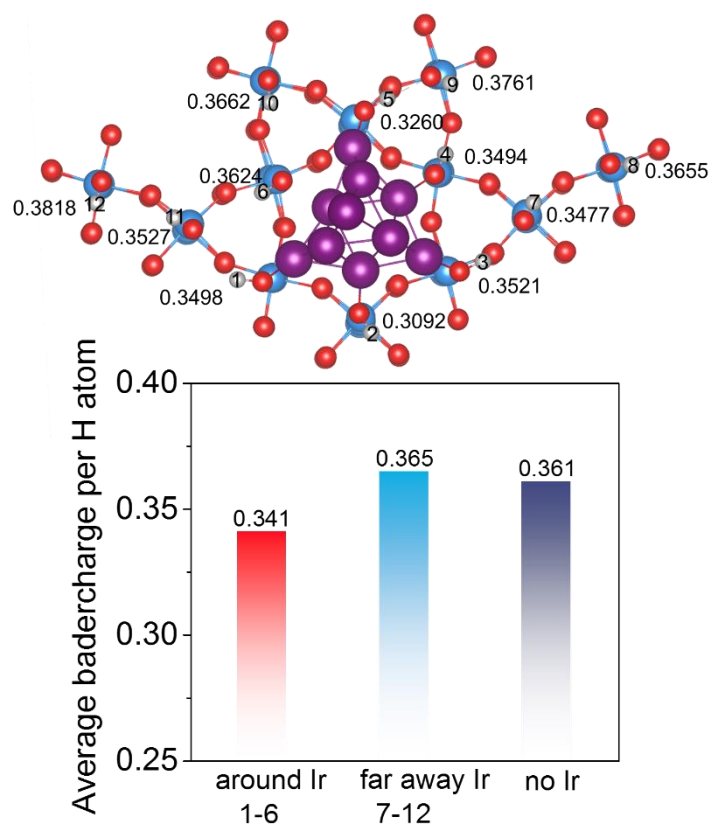

**Supplementary Figure 17. Analysis of Bader charge.** The bader charge of different H atoms ( $H_1$ - $H_{12}$ ) in  $Ir-H_xWO_3$  and corresponding average bader charges values of  $H_1$ - $H_6$  (around Ir),  $H_7$ - $H_{12}$  (far away from Ir) and pure  $H_xWO_3$ .

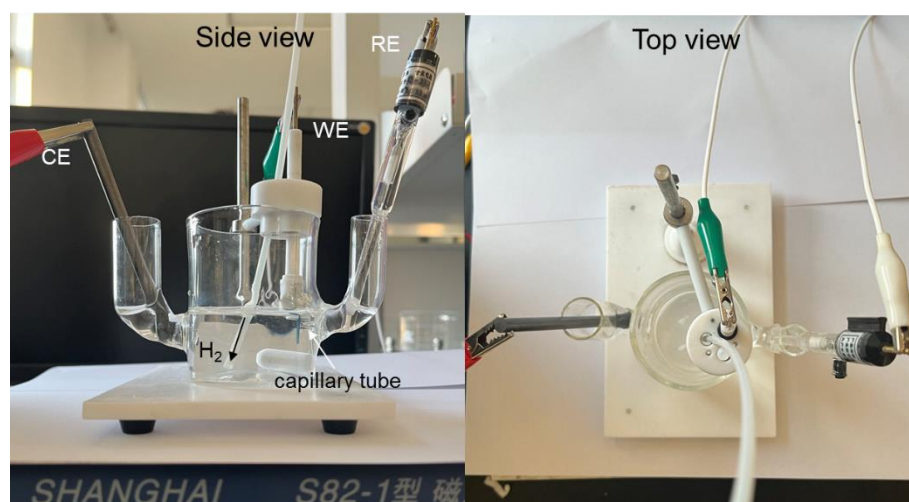

**Supplementary Figure 18. Electrochemical cell set-up.** The side and top views of a conventional three-electrode electrochemical cell.

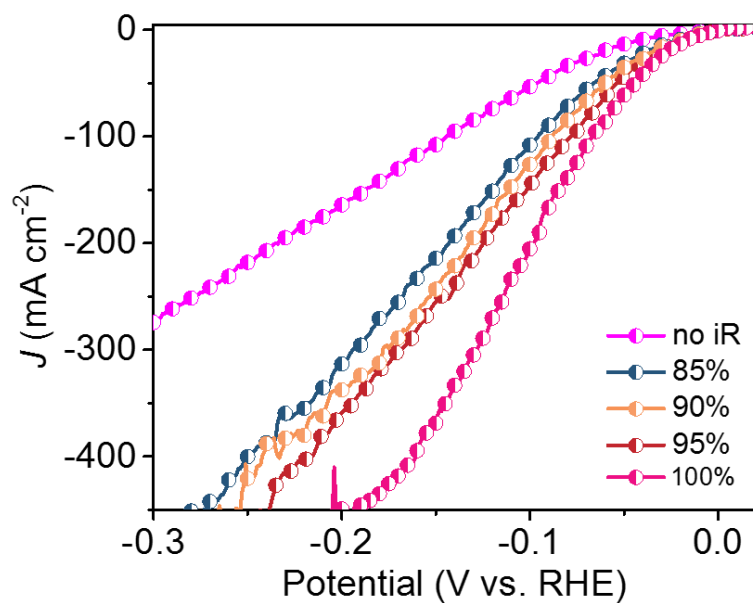

**Supplementary Figure 19. Analysis of different levels of iR compensation.** The polarization curves of Ir-H<sub>x</sub>WO<sub>3</sub> with different levels of iR compensation. The polarization curve with 100% iR compensation is clearly overcorrected. Therefore, the data of 95% iR compensation is presented in Fig. 4a.

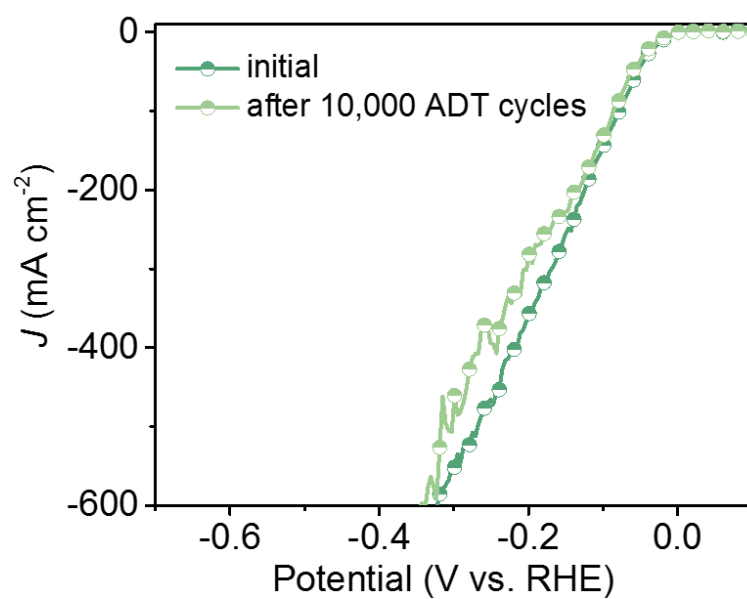

**Supplementary Figure 20. The stability test by ADT cycles.** HER polarization curves of Ir-H<sub>x</sub>WO<sub>3</sub> with 95% iR compensation before and after 10,000 ADT cycles.

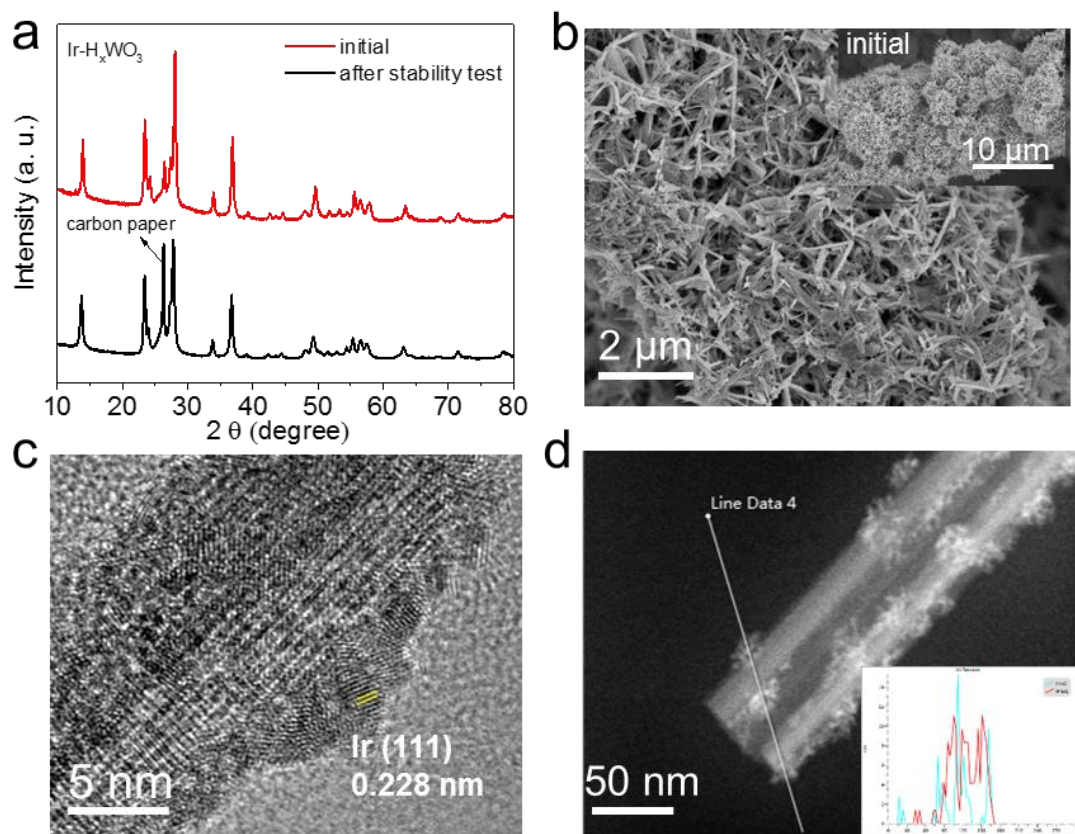

**Supplementary Figure 21. Structural analysis of catalysts after stability test.** (a) The XRD patterns of  $\text{Ir-H}_x\text{WO}_3$  before and after stability test. (b,c) The SEM and HRTEM images of  $\text{Ir-H}_x\text{WO}_3$  after stability test, the inset in (b) giving the initial morphology of catalyst. (d) Line-scan profile of postmortem  $\text{Ir-H}_x\text{WO}_3$  for Ir, W and O elements.

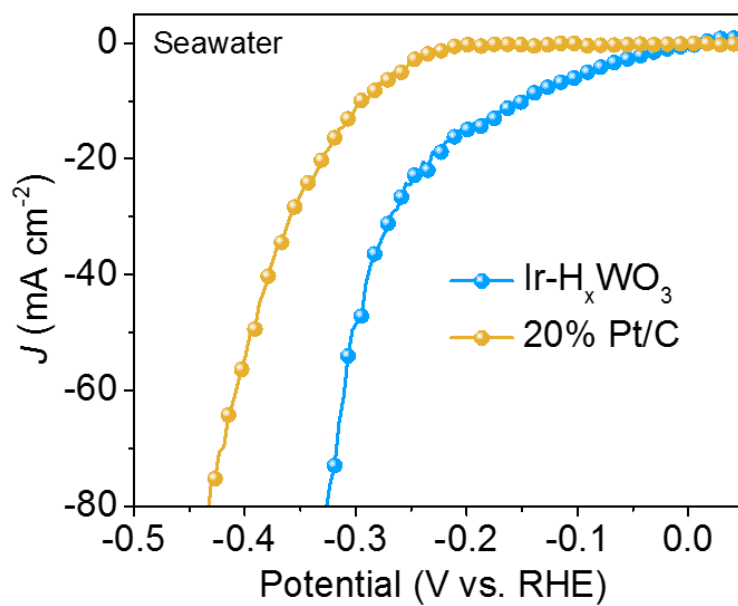

**Supplementary Figure 22. The HER performance of catalysts in natural seawater.** The LSV plots of  $\text{Ir-H}_x\text{WO}_3$  and 20% Pt/C in nature seawater with 95% iR compensation.



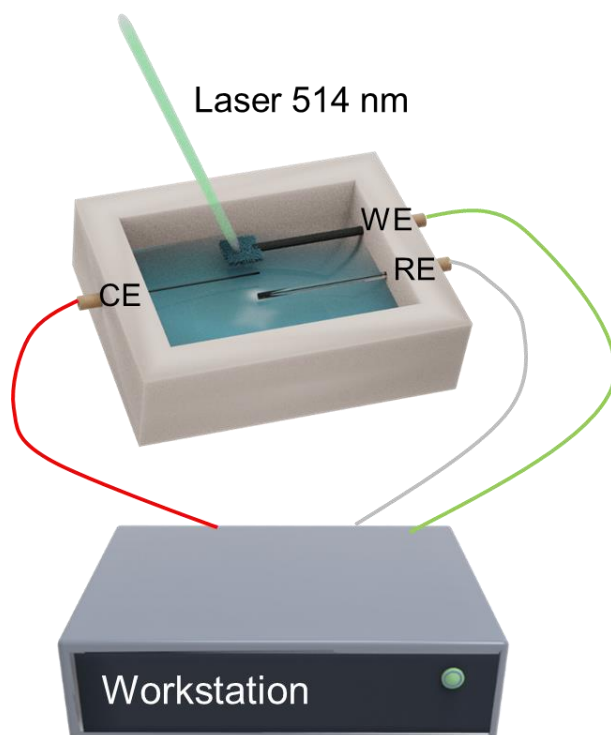

**Supplementary Figure 23.** Electrochemical set-up used for operando study in this work. The illustration of operando Raman spectroscopy setup.

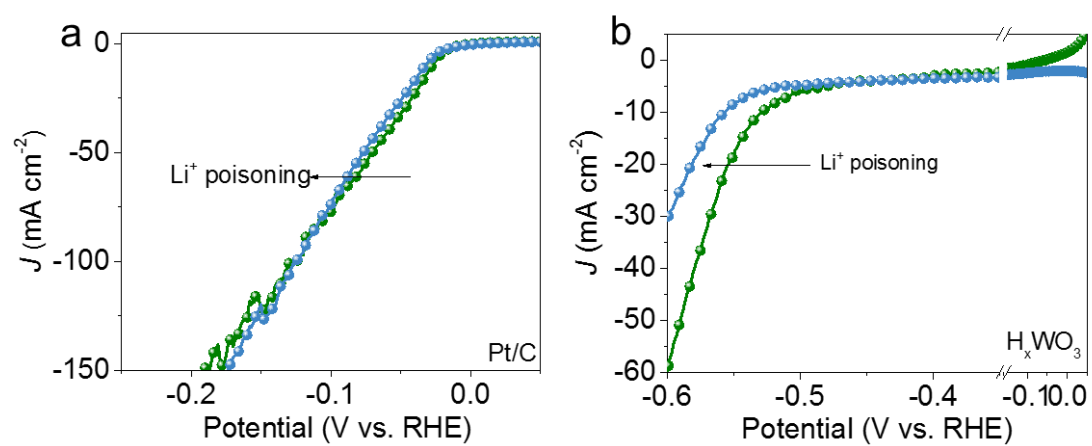

**Supplementary Figure 24. Effect of  $\text{Li}^+$  poisoning on the catalyst.** The LSV plots of 20% Pt/C (a) and  $\text{H}_x\text{WO}_3$  support (b) with 95% iR compensation before and after  $\text{Li}^+$  poisoning treatments.

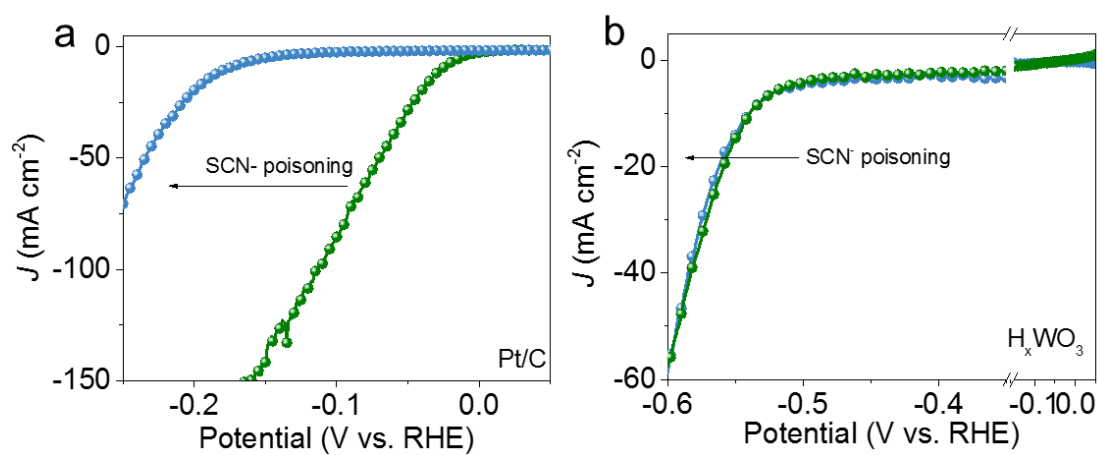

**Supplementary Figure 25. Effect of  $\text{SCN}^-$  poisoning on the catalyst.** The LSV plots of 20% Pt/C (a) and  $\text{H}_x\text{WO}_3$  support (b) with 95% iR compensation before and after  $\text{SCN}^-$  poisoning treatments.

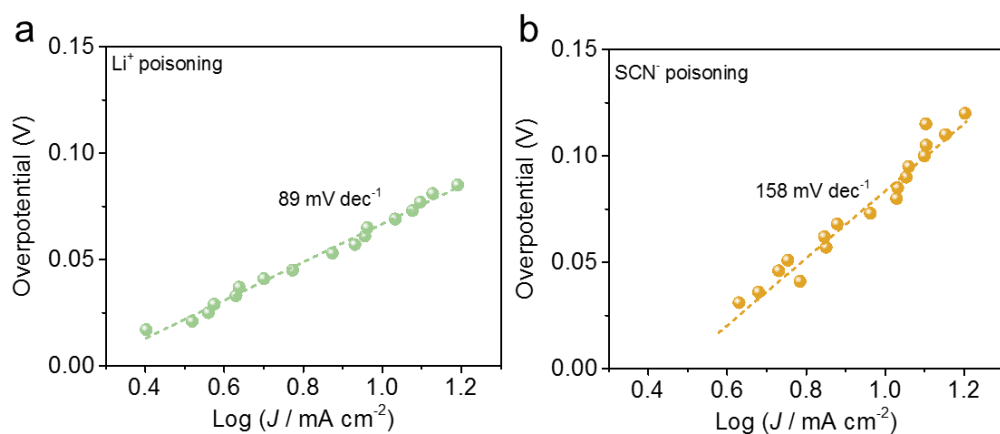

**Supplementary Figure 26. Reaction kinetic analysis of catalyst after Li<sup>+</sup> and SCN<sup>-</sup> poisoning.**  
The Tafel plots of Ir-H<sub>x</sub>WO<sub>3</sub> after Li<sup>+</sup> poisoning (a) and SCN<sup>-</sup> poisoning (b).

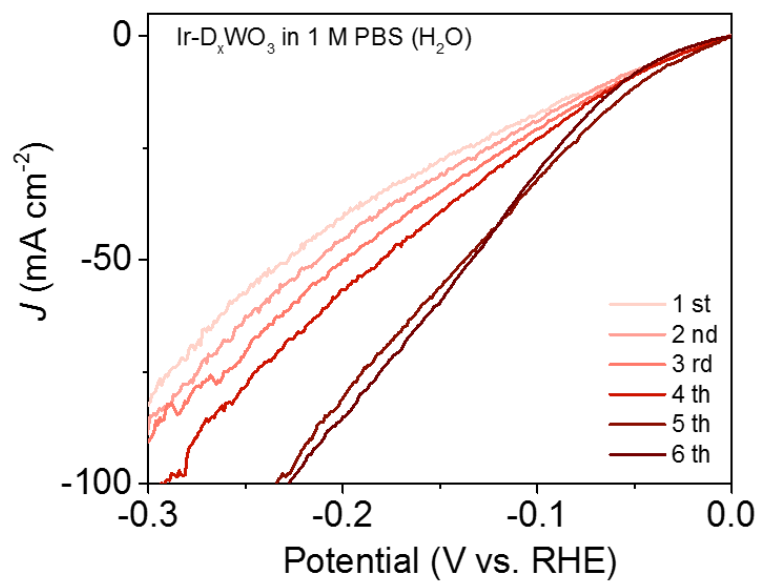

**Supplementary Figure 27. The activation process of Ir-D<sub>x</sub>WO<sub>3</sub>.** The LSV plots of Ir-D<sub>x</sub>WO<sub>3</sub> in 1.0 M PBS (H<sub>2</sub>O) solution with 95% iR compensation after different numbers of HER cycles were performed on it.

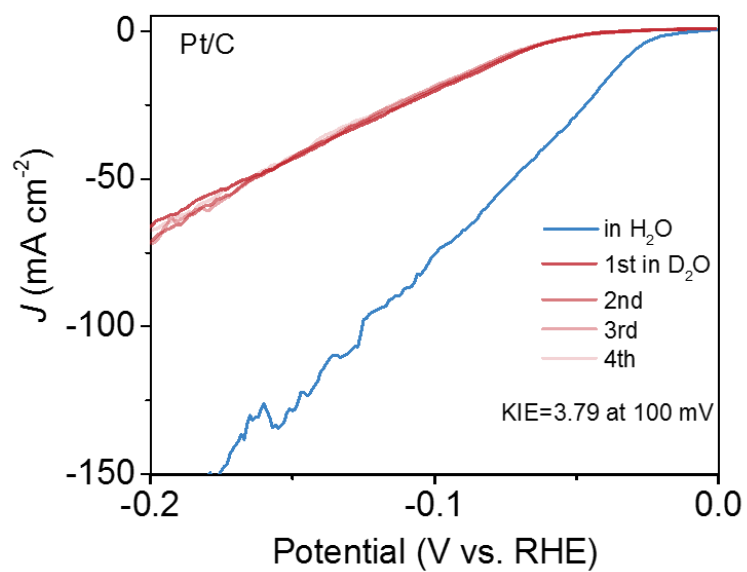

**Supplementary Figure 28. KIE effect on Pt/C catalyst.** The LSV plots of Pt/C in 1.0 M PBS (D<sub>2</sub>O) solution with 95% iR compensation after different numbers of HER cycles were performed on it.

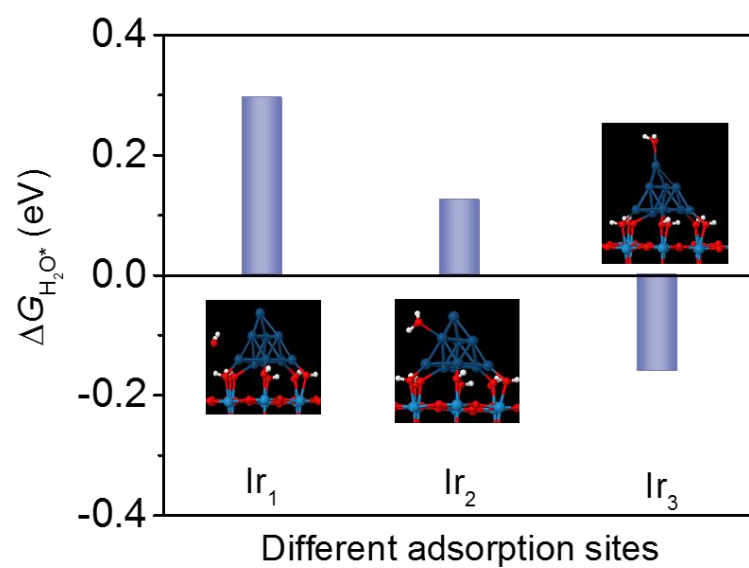

**Supplementary Figure 29. Adsorption behavior of water molecules.** The adsorbed free energy of  $\text{H}_2\text{O}$  at different Ir sites

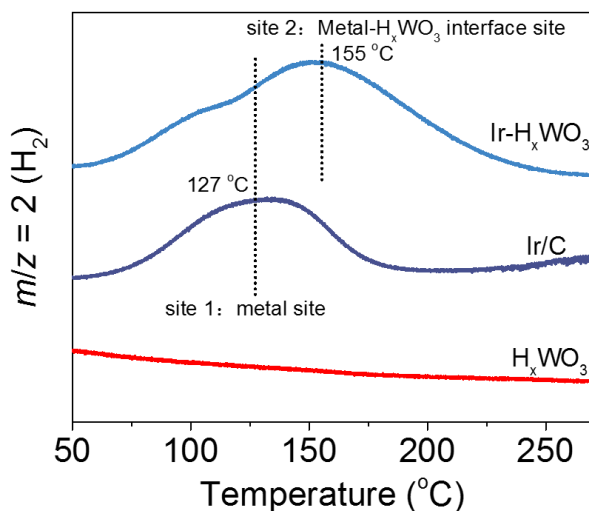

**Supplementary Figure 30. Analysis of H<sub>2</sub>-TPD data.** The H<sub>2</sub>-TPD patterns of Ir-H<sub>x</sub>WO<sub>3</sub>, commercial Ir/C and H<sub>x</sub>WO<sub>3</sub> samples.

Supplement: The H<sub>2</sub>-TPD profile of commercial Ir/C catalyst exhibits a single desorption peak centered at 127 °C, which is ascribed to the desorption of atomic H over the metallic Ir surface. As we expected in Ir-H<sub>x</sub>WO<sub>3</sub> sample, in addition to the observation of H<sub>2</sub> desorption site located on the metal surface, the unique dehydrogenation signal over interface of Ir metal and H<sub>x</sub>WO<sub>3</sub> support (155 °C) is also detected, which is consistent with previous results in the literature<sup>1-3</sup>. Moreover, by comparing the amount of dehydrogenation at different sites, we found that H<sub>2</sub> desorption at the interface site is dominant.



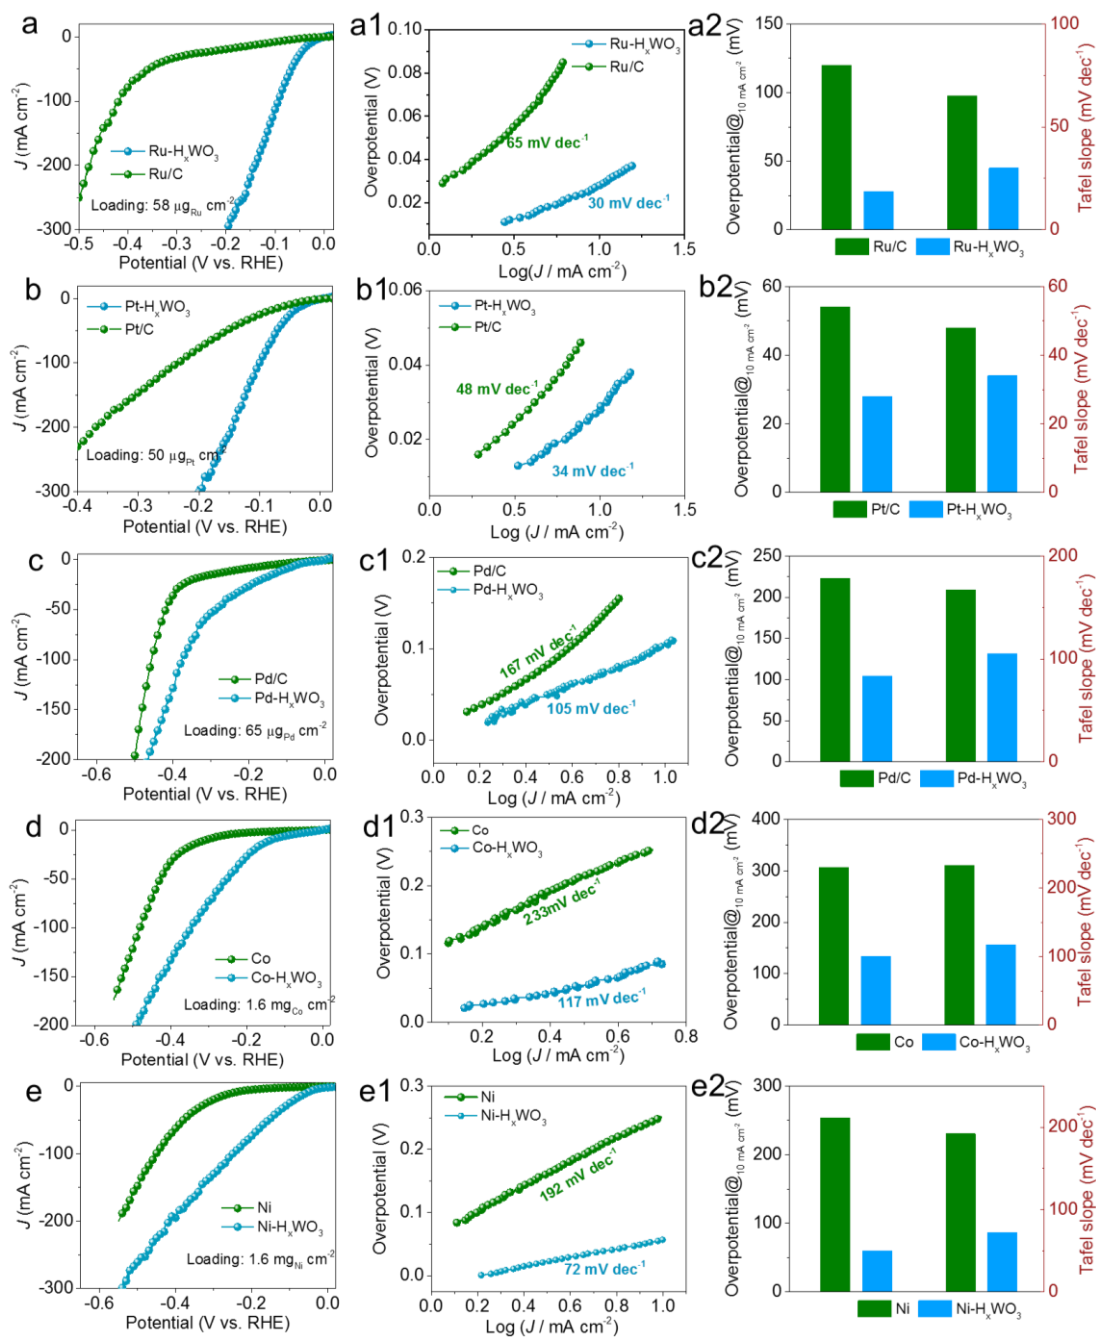

**Supplementary Figure 31. Neutral HER performance of M-H<sub>x</sub>WO<sub>3</sub> and M-Carbon systems.**

The LSV curves, Tafel plots and corresponding activity comparison of M-H<sub>x</sub>WO<sub>3</sub> and M-Carbon systems (M = Ru, Pt, Pd, Co, Ni) in 1.0 M PBS solution. Ru: a-a2; Pt: b-b2; Pd: c-c2; Co: d-d2; Ni: e-e2. All electrochemical data were corrected for 95% iR drop.

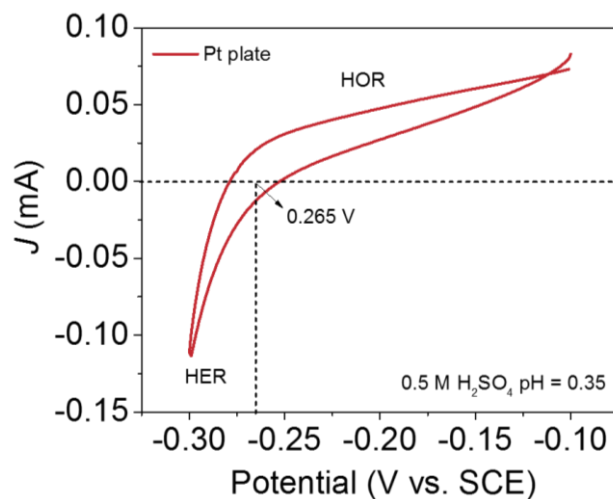

**Supplementary Figure 32. Reference electrode calibration.** CV curve of a Pt plate (area: 1 cm<sup>2</sup>) in high-purity hydrogen-saturated 0.5 M H<sub>2</sub>SO<sub>4</sub> solution (pH = 0.35) at a scan rate of 2 mV s<sup>-1</sup>. The average of the two potentials at which the current crossed zero was regarded as the thermodynamic potential for the hydrogen electrode reaction<sup>4</sup>. The standard potential (vs. RHE) of the saturated calomel electrode is calibrated to be approximately 0.244 V.

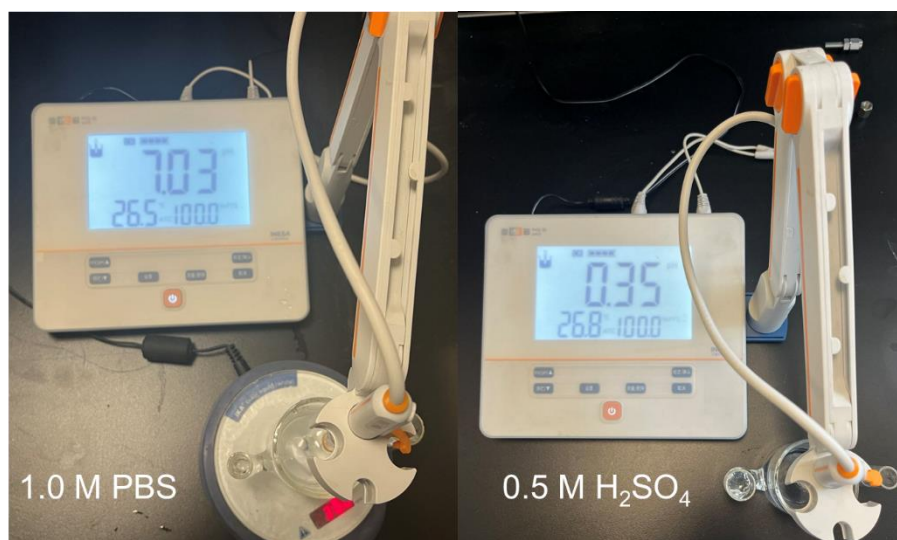

**Supplementary Figure 33. pH measurements of the electrolyte.** The pH of 1.0 M PBS and 0.5 M H<sub>2</sub>SO<sub>4</sub> electrolyte measured by pH meter.

## 2. Supplementary Tables

**Supplementary Table 1.** Noble metal content of M-H<sub>x</sub>WO<sub>3</sub> (M = Ir, Ru, Pt, Pd), Ir/C, Pt/C, Ru/C and Pd/C determined by inductively coupled plasma optical emission spectrometry (ICP-OES).

| Catalysts                              | Initial                             | After long-term test                |
|----------------------------------------|-------------------------------------|-------------------------------------|
| Ir-H <sub>x</sub> WO <sub>3</sub> /CFP | <sup>a</sup> 2.8%                   | <sup>a</sup> 2.6%                   |
|                                        | <sup>b</sup> 47 μg cm <sup>-2</sup> | <sup>b</sup> 40 μg cm <sup>-2</sup> |
| Ru-H <sub>x</sub> WO <sub>3</sub> /CFP | 58 μg cm <sup>-2</sup>              | /                                   |
| Pt-H <sub>x</sub> WO <sub>3</sub> /CFP | 50 μg cm <sup>-2</sup>              | /                                   |
| Pd-H <sub>x</sub> WO <sub>3</sub> /CFP | 65 μg cm <sup>-2</sup>              | /                                   |
| Commercial 10 wt% Ir/C                 | 9.8 %                               | /                                   |
| Commercial 20 wt% Pt/C                 | 19.6 %                              | /                                   |
| Commercial 5 wt% Ru/C                  | 4.9 %                               | /                                   |
| Commercial 5 wt% Pd/C                  | 4.9 %                               | /                                   |

<sup>a</sup> Ir loading normalized to H<sub>x</sub>WO<sub>3</sub> support, the calculation formula is as follows: Ir wt% =

$$\frac{m(\text{Ir})}{m(\text{Ir-H}_x\text{WO}_3/\text{CFP})-m(\text{CFP})} * 100 \%$$

<sup>b</sup> Ir loading normalized to geometric area of CFP support, the calculation formula is as follows: Ir

$$\text{wt}\% = \frac{m(\text{Ir})}{A(\text{CFP})}$$

**Supplementary Table 2.** Comparison of HER activities with various recently reported state-of-the-art catalysts in neutral electrolyte.

| Catalysts                                               | $\eta_{10}$<br>/mV | Tafel<br>/mV<br>dec <sup>-1</sup> | Electrolyte | <i>iR</i><br>compensation                | Stability                                                                             | References                                      |
|---------------------------------------------------------|--------------------|-----------------------------------|-------------|------------------------------------------|---------------------------------------------------------------------------------------|-------------------------------------------------|
| <b>Ir-H<sub>x</sub>WO<sub>3</sub></b>                   | 20                 | 28                                | 1 M PBS     | 95%                                      | 100 h @ 10 mA cm <sup>-2</sup><br>40 h @ 500 mA cm <sup>-2</sup><br>10,000 ADT cycles | This work                                       |
| <b>Ni<sub>0.1</sub>Co<sub>0.9</sub>P</b>                | 125                | 109                               | 1 M PBS     | 100%                                     | 20 h @ 30 mA cm <sup>-2</sup>                                                         | <i>Angew. Chem. Int. Ed.</i> , 2018, 130, 15671 |
| <b>CrO<sub>x</sub>/Ni-Cu</b>                            | 48                 | 64                                | 1 M PBS     | 100%                                     | 24 h @ -0.1 V <sub>RHE</sub> ~ 33 mA cm <sup>-2</sup>                                 | <i>Nat. Energy</i> , 2019, 4, 107               |
| <b>N-Co<sub>2</sub>P/CC</b>                             | 42                 | 64                                | 1 M PBS     | 100%                                     | 3000 CV cycles                                                                        | <i>ACS Catal.</i> , 2019, 9, 3744               |
| <b>Pt<sub>SA</sub>-NT-NF</b>                            | 24                 | 30                                | 1 M PBS     | 90%, <i>R</i> ~ 3 Ω                      | 24 h @ 10 mA cm <sup>-2</sup>                                                         | <i>Angew. Chem. Int. Ed.</i> , 2017, 56, 13694  |
| <b>Mn-Co-P/Ti</b>                                       | 86                 | 82                                | 1 M PBS     | 100%                                     | 1000 CV cycles<br>10 h @ -0.096 V <sub>RHE</sub> ~ 10 mA cm <sup>-2</sup>             | <i>ACS Catal.</i> , 2017, 7, 98                 |
| <b>Ni(S<sub>0.5</sub>Se<sub>0.5</sub>)<sub>2</sub></b>  | 124                | 81                                | 1 M PBS     | -                                        | 2000 CV cycles<br>20 h @ -0.125 V <sub>RHE</sub> ~ 10 mA cm <sup>-2</sup>             | <i>J. Mater. Chem. A</i> , 2019, 7, 16793       |
| <b>Ni<sub>0.89</sub>Co<sub>0.11</sub>Se<sub>2</sub></b> | 82                 | 78                                | 1 M PBS     | -                                        | 40 h @ -0.2 V <sub>RHE</sub> ~ 45 mA cm <sup>-2</sup>                                 | <i>Adv. Mater.</i> , 2017, 29, 1606521          |
| <b>MoP700</b>                                           | 196                | 79                                | 1 M PBS     | <i>iR</i> -free                          | 4000 CV cycles                                                                        | <i>ACS Catal.</i> , 2019, 9, 8712               |
| <b>N-Ni</b>                                             | 64                 | 108                               | 1 M PBS     | 100%                                     | 18 h @ 20 mA cm <sup>-2</sup>                                                         | <i>J. Am. Chem. Soc.</i> , 2017, 139, 12283     |
| <b>Co-HNP/CC</b>                                        | 85                 | 38                                | 1 M PBS     | 100%, <i>R</i> ~ 1.7-2 Ω cm <sup>2</sup> | 20 h @ 150 mA cm <sup>-2</sup>                                                        | <i>Angew. Chem. Int. Ed.</i> , 2016, 55, 6725   |
| <b>CoP/Co-MOF</b>                                       | 49                 | 63                                | 1 M PBS     | 100%                                     | 60,000 s @ 20 and 50 mA cm <sup>-2</sup>                                              | <i>Angew. Chem. Int. Ed.</i> , 2019, 58, 4679   |
| <b>Karst NF</b>                                         | 110                | 99                                | -           | 90%                                      | 10 h @ -0.21 V <sub>RHE</sub> ~ 10 mA cm <sup>-2</sup>                                | <i>Energy Environ. Sci.</i> , 2020, 13, 174     |
| <b>Ni<sub>0.33</sub>Co<sub>0.67</sub>S<sub>2</sub></b>  | 72                 | 68                                | 1 M PBS     | 100%                                     | 20 h @ -0.07 V <sub>RHE</sub> ~ 10 mA cm <sup>-2</sup>                                | <i>Adv. Energy Mater.</i> , 2015, 5, 1402031    |

|                                            |    |      |                            |      |                                                           |                                                 |
|--------------------------------------------|----|------|----------------------------|------|-----------------------------------------------------------|-------------------------------------------------|
| <b>Cu<sub>0.08</sub>Co<sub>0.92</sub>P</b> | 81 | 83.5 | 0.5 M<br>KHCO <sub>3</sub> | 100% | 3000 CV cycles<br>20 h @ 10 mA cm <sup>-2</sup>           | <i>Appl. Catal., B,</i><br>2020, 265,<br>118555 |
| <b>Pt/np-<br/>Co<sub>0.85</sub>Se</b>      | 55 | 35   | 1 M PBS                    | 100% | 40 h @ -0.05 V <sub>RHE</sub> ~<br>10 mA cm <sup>-2</sup> | <i>Nat. Commun.</i><br>2019<br>10, 1743         |

---

**Supplementary Table 3.** Comparison of HER activities with various recently reported state-of-the-art catalysts in nature seawater.

| Electrocatalysts                                                                     | $\eta_{10}$ / mV | Electrolyte      | References                                        |
|--------------------------------------------------------------------------------------|------------------|------------------|---------------------------------------------------|
| Ir-H <sub>x</sub> WO <sub>3</sub>                                                    | 150              | Natural seawater | This work                                         |
| Co <sub>0.31</sub> Mo <sub>1.69</sub> C@NC                                           | 312              | Natural seawater | <i>Adv. Energy Mater.</i> 2019, 9, 1901333.       |
| Rh@N,S-C                                                                             | 320              | Natural seawater | <i>ACS Sustainable Chem. Eng.</i> 2019, 7, 18835. |
| Ni <sub>5</sub> P <sub>4</sub> @Ni <sup>2+δ</sup> O <sub>δ</sub> (OH) <sub>2-δ</sub> | 144              | Natural seawater | <i>Appl. Catal. B</i> 2019, 251, 181.             |
| Mo <sub>2</sub> C-MoP@N,P-C                                                          | 346              | Natural seawater | <i>Electrochim. Acta</i> 2018, 281, 710.          |
| Mn-NiO-Ni/Ni                                                                         | 170              | Natural seawater | <i>Energy Environ. Sci.</i> 2018, 11, 1898.       |
| 2.4% Pt@mh-3D MXene                                                                  | 280              | Natural seawater | <i>Adv. Funct. Mater.</i> 2020, 30, 1910028       |
| NiRuIr-G                                                                             | 200              | Natural seawater | <i>Electrochem. Commun.</i> , 2020, 111, 106647   |
| NiCoN[NixP]NiCoN                                                                     | 165              | Natural seawater | <i>ACS Energy Lett.</i> 2020, 5, 8, 2681          |
| NiCoP/NF                                                                             | 287              | Natural seawater | <i>ACS Appl. Energy Mater.</i> 2019, 2, 5, 3910   |
| h-MoN@BNCNT                                                                          | 160              | Natural seawater | <i>Adv. Funct. Mater.</i> 2019, 29, 1805893       |
| CoMoP@C                                                                              | 448              | Natural seawater | <i>Energy Environ. Sci.</i> , 2017, 10, 788       |
| Mo <sub>5</sub> N <sub>6</sub>                                                       | 257              | Natural seawater | <i>ACS Nano</i> 2018, 12, 12, 12761               |

### 3. Supplementary References

1. Panagiotopoulou, P. & Kondarides, D. I. Effects of alkali additives on the physicochemical characteristics and chemisorptive properties of Pt/TiO<sub>2</sub> catalysts. *J. Catal.* **260**, 141-149 (2008).
2. Li, W. et al. Skeletal isomerization of n-pentane: a comparative study on catalytic properties of Pt/WO<sub>x</sub>-ZrO<sub>2</sub> and Pt/ZSM-22. *Appl. Catal. A-Gen* **537**, 59-65 (2017).
3. Dolsirittigul, N. et al. Structure-Activity Relationships of Pt-WO<sub>x</sub>/Al<sub>2</sub>O<sub>3</sub> Prepared with Different W Contents and Pretreatment Conditions for Glycerol Conversion to 1, 3-Propanediol. *Top. Catal.* **66**, 205-222 (2023).
4. Yu, L. et al.. Non-noble metal-nitride based electrocatalysts for high-performance alkaline seawater electrolysis. *Nat. Commun.* **10**, 5106 (2019).
